# Supplementary material
Source: ML conference proceedings conference paper supplement (https://openaccess.thecvf.com/content/cvpr_2016/html/Vemulapalli_Gaussian_Conditional_Random_2016_CVPR_paper.html)
Supplement: Supplementary file 1 [file Vemulapalli_Gaussian_Conditional_Random_2016_CVPR_supplemental.pdf]

# Gaussian Conditional Random Field Network for Semantic Segmentation - Supplementary Material

Raviteja Vemulapalli<sup>†</sup>, Oncel Tuzel<sup>\*</sup>, Ming-Yu Liu<sup>\*</sup>, and Rama Chellappa<sup>†</sup>  
<sup>†</sup>Center for Automation Research, UMIACS, University of Maryland, College Park.  
<sup>\*</sup>Mitsubishi Electric Research Laboratories, Cambridge, MA.

## Abstract

*In Section 1 of this supplementary material, we derive the mean field update equation for the Gaussian distribution used in this paper. Section 2 provides the relevant derivative formulas for backpropagation and Section 3 presents a detailed algorithmic description of the proposed Gaussian CRF network.*

**Notations:** We use bold face small letters to denote vectors and bold face capital letters to denote matrices. We use  $\mathbf{A}^\top$ ,  $\mathbf{A}^{-1}$ ,  $|\mathbf{A}|$  and  $\text{trace}(\mathbf{A})$  to denote the transpose, inverse, determinant and trace of a matrix  $\mathbf{A}$ , respectively. We use  $\|\mathbf{b}\|_2^2$  to denote the squared  $\ell_2$  norm of a vector  $\mathbf{b}$ .  $\mathbf{A} \succeq 0$  means  $\mathbf{A}$  is symmetric and positive semidefinite. We use  $\mathcal{R}$  to denote the set of real numbers and  $\mathbb{E}$  to denote expectation.

## 1. Mean field inference

In this work, we model the conditional probability density  $P(\mathbf{y}|\mathbf{X})$  as a Gaussian distribution given by

$$\begin{aligned}
 P(\mathbf{y}|\mathbf{X}) &\propto \exp \left\{ -\frac{1}{2} E(\mathbf{y}|\mathbf{X}) \right\}, \text{ where} \\
 E(\mathbf{y}|\mathbf{X}) &= \sum_i \|\mathbf{y}_i - \mathbf{r}_i\|_2^2 + \sum_{ij} (\mathbf{y}_i - \mathbf{y}_j)^\top \mathbf{W}_{ij} (\mathbf{y}_i - \mathbf{y}_j) \\
 &= \sum_i \mathbf{y}_i^\top \left( I + \sum_j \mathbf{W}_{ij} \right) \mathbf{y}_i - 2 \sum_i \mathbf{r}_i^\top \mathbf{y}_i + \sum_i \mathbf{r}_i^\top \mathbf{r}_i - 2 \sum_{ij} \mathbf{y}_i^\top \mathbf{W}_{ij} \mathbf{y}_j
 \end{aligned} \tag{1}$$

The standard mean field approach approximates the joint Gaussian distribution  $P(\mathbf{y}|\mathbf{X})$  using a simpler Gaussian distribution  $Q(\mathbf{y}|\mathbf{X})$  which can be written as a product of independent marginals, i.e,  $Q(\mathbf{y}|\mathbf{X}) = \prod_i Q_i(\mathbf{y}_i|\mathbf{X})$ <sup>1</sup>, where  $Q_i(\mathbf{y}_i|\mathbf{X})$  is a Gaussian distribution with mean  $\boldsymbol{\mu}_i \in \mathcal{R}^K$  and covariance  $\boldsymbol{\Sigma}_i \in \mathcal{R}^{K \times K}$ . The parameters  $\{\boldsymbol{\mu}_i, \boldsymbol{\Sigma}_i\}$  of  $Q$  are obtained by minimizing the KL-divergence between the distributions  $Q$  and  $P$ .

<sup>1</sup>Note that instead of using marginals of scalar variables  $y_{ik}$ , we are using marginals of vector variables  $\mathbf{y}_i$ .

$$\begin{aligned}
KL(Q||P) &= \int Q(\mathbf{y}|\mathbf{X}) \log \left[ \frac{Q(\mathbf{y}|\mathbf{X})}{P(\mathbf{y}|\mathbf{X})} \right] \\
&= \int Q(\mathbf{y}|\mathbf{X}) \log [Q(\mathbf{y}|\mathbf{X})] - \int Q(\mathbf{y}|\mathbf{X}) \log [P(\mathbf{y}|\mathbf{X})] \\
&= \sum_i \int Q_i(\mathbf{y}_i|\mathbf{X}) \log [Q_i(\mathbf{y}_i|\mathbf{X})] - \int Q(\mathbf{y}|\mathbf{X}) \log [P(\mathbf{y}|\mathbf{X})] \quad \left( \text{using } Q(\mathbf{y}|\mathbf{X}) = \prod_i Q_i(\mathbf{y}_i|\mathbf{X}) \right) \\
&= - \sum_i \frac{1}{2} \log [(2\pi e)^K |\boldsymbol{\Sigma}_i|] - \int Q(\mathbf{y}|\mathbf{X}) \log [P(\mathbf{y}|\mathbf{X})]
\end{aligned} \tag{2}$$

$$\begin{aligned}
\{\boldsymbol{\mu}_i^*, \boldsymbol{\Sigma}_i^*\} &= \operatorname{argmin}_{\{\boldsymbol{\mu}_i, \boldsymbol{\Sigma}_i\}} KL(Q||P) \\
&= \operatorname{argmin}_{\{\boldsymbol{\mu}_i, \boldsymbol{\Sigma}_i\}} - \sum_i \frac{1}{2} \log [(2\pi e)^K |\boldsymbol{\Sigma}_i|] - \int Q(\mathbf{y}|\mathbf{X}) \log [P(\mathbf{y}|\mathbf{X})] \\
&= \operatorname{argmin}_{\{\boldsymbol{\mu}_i, \boldsymbol{\Sigma}_i\}} - \sum_i \log [|\boldsymbol{\Sigma}_i|] + \sum_i \int Q(\mathbf{y}|\mathbf{X}) \mathbf{y}_i^\top \left( I + \sum_j \mathbf{W}_{ij} \right) \mathbf{y}_i - 2 \sum_i \int Q(\mathbf{y}|\mathbf{X}) \mathbf{r}_i^\top \mathbf{y}_i \\
&\quad - 2 \sum_{ij} \int Q(\mathbf{y}|\mathbf{X}) \mathbf{y}_i^\top \mathbf{W}_{ij} \mathbf{y}_j \\
&= \operatorname{argmin}_{\{\boldsymbol{\mu}_i, \boldsymbol{\Sigma}_i\}} - \sum_i \log [|\boldsymbol{\Sigma}_i|] + \sum_i \mathbb{E} \left[ \mathbf{y}_i^\top \left( I + \sum_j \mathbf{W}_{ij} \right) \mathbf{y}_i \right] - 2 \sum_i \mathbb{E} [\mathbf{r}_i^\top \mathbf{y}_i] \\
&\quad - 2 \sum_{ij} \mathbb{E} [\mathbf{y}_i^\top \mathbf{W}_{ij} \mathbf{y}_j] \\
&= \operatorname{argmin}_{\{\boldsymbol{\mu}_i, \boldsymbol{\Sigma}_i\}} - \sum_i \log [|\boldsymbol{\Sigma}_i|] + \sum_i \mathbb{E} \left[ \operatorname{trace} \left( \mathbf{y}_i \mathbf{y}_i^\top \left( I + \sum_j \mathbf{W}_{ij} \right) \right) \right] - 2 \sum_i \mathbb{E} [\mathbf{r}_i^\top \mathbf{y}_i] \\
&\quad - 2 \sum_{ij} \mathbb{E} [\operatorname{trace} (\mathbf{y}_j \mathbf{y}_i^\top \mathbf{W}_{ij})] \\
&= \operatorname{argmin}_{\{\boldsymbol{\mu}_i, \boldsymbol{\Sigma}_i\}} - \sum_i \log [|\boldsymbol{\Sigma}_i|] + \sum_i \operatorname{trace} \left( \mathbb{E} [\mathbf{y}_i \mathbf{y}_i^\top] \left( I + \sum_j \mathbf{W}_{ij} \right) \right) - 2 \sum_i \mathbb{E} [\mathbf{r}_i^\top \mathbf{y}_i] \\
&\quad - 2 \sum_{ij} \operatorname{trace} (\mathbb{E} [\mathbf{y}_j \mathbf{y}_i^\top] \mathbf{W}_{ij}) \\
&= \operatorname{argmin}_{\{\boldsymbol{\mu}_i, \boldsymbol{\Sigma}_i\}} - \sum_i \log [|\boldsymbol{\Sigma}_i|] + \sum_i \operatorname{trace} \left( (\boldsymbol{\Sigma}_i + \boldsymbol{\mu}_i \boldsymbol{\mu}_i^\top) \left( I + \sum_j \mathbf{W}_{ij} \right) \right) - 2 \sum_i \mathbf{r}_i^\top \boldsymbol{\mu}_i \\
&\quad - 2 \sum_{ij} \operatorname{trace} (\boldsymbol{\mu}_j \boldsymbol{\mu}_i^\top \mathbf{W}_{ij})
\end{aligned} \tag{3}$$

Note that in the last step, we have used the fact that  $\mathbf{y}_i$  and  $\mathbf{y}_j$  are independent under the distribution  $Q$ . From (3) we have,

$$\boldsymbol{\Sigma}_i^* = \operatorname{argmin}_{\boldsymbol{\Sigma}_i} \operatorname{trace} \left( \boldsymbol{\Sigma}_i \left( I + \sum_j \mathbf{W}_{ij} \right) \right) - \log [|\boldsymbol{\Sigma}_i|] \tag{4}$$

Note that (4) is a convex problem. Differentiating the cost function and setting the gradient to zero, we get  $\boldsymbol{\Sigma}_i^* = \left( I + \sum_j \mathbf{W}_{ij} \right)^{-1}$ .

From (3) we have,

$$\begin{aligned}\boldsymbol{\mu}_i^* &= \underset{\boldsymbol{\mu}_i}{\operatorname{argmin}} \operatorname{trace} \left( \boldsymbol{\mu}_i \boldsymbol{\mu}_i^\top \left( I + \sum_j \mathbf{W}_{ij} \right) \right) - 2\mathbf{r}_i^\top \boldsymbol{\mu}_i - 2 \sum_j \operatorname{trace} (\boldsymbol{\mu}_j^* \boldsymbol{\mu}_i^\top \mathbf{W}_{ij}) \\ &= \underset{\boldsymbol{\mu}_i}{\operatorname{argmin}} \boldsymbol{\mu}_i^\top \left( I + \sum_j \mathbf{W}_{ij} \right) \boldsymbol{\mu}_i - 2\mathbf{r}_i^\top \boldsymbol{\mu}_i - 2\boldsymbol{\mu}_i^\top \left( \sum_j \mathbf{W}_{ij} \boldsymbol{\mu}_j^* \right)\end{aligned}\tag{5}$$

Note that (5) is a convex problem. Differentiating the cost function and setting the gradient to zero, we get

$$\boldsymbol{\mu}_i^* = \left( I + \sum_j \mathbf{W}_{ij} \right)^{-1} \left( \mathbf{r}_i + \sum_j \mathbf{w}_{ij} \boldsymbol{\mu}_j^* \right).\tag{6}$$

Hence, for the Gaussian distribution in (1), the mean field update for computing the means  $\{\boldsymbol{\mu}_i\}$  is given by

$$\boldsymbol{\mu}_i \leftarrow \left( I + \sum_j \mathbf{W}_{ij} \right)^{-1} \left( \mathbf{r}_i + \sum_j \mathbf{W}_{ij} \boldsymbol{\mu}_j \right).\tag{7}$$

## 2. Backpropagation

Let  $L$  be the final loss function.

### Backpropagating through the matrix generation layer:

Given the derivatives  $dL/d\mathbf{W}_{ij}$  of the loss function with respect to the output of the matrix generation layer, we can compute the derivatives of  $L$  with respect to its input  $s_{ij}$  and parameters  $\mathbf{C}$  using

$$\frac{dL}{ds_{ij}} = \operatorname{trace} \left( \left( \frac{dL}{d\mathbf{W}_{ij}} \right)^\top \mathbf{C} \right),\tag{8}$$

$$\frac{dL}{d\mathbf{C}} = \sum_{ij} s_{ij} \frac{dL}{d\mathbf{W}_{ij}}.$$

### Backpropagating through the similarity layer:

Given the derivatives  $dL/ds_{ij}$  of the loss function with respect to the output of the similarity layer, we can compute the derivatives of  $L$  with respect to its input  $\mathbf{z}_i$  and parameters  $\mathbf{f}_m$  using

$$\frac{dL}{d\mathbf{z}_i} = 2 \left( \sum_{m=1}^M \mathbf{f}_m \mathbf{f}_m^\top \right) \left( \sum_j s_{ij} \frac{dL}{ds_{ij}} (\mathbf{z}_j - \mathbf{z}_i) \right),\tag{9}$$

$$\frac{dL}{d\mathbf{f}_m} = -2 \left( \sum_{ij} s_{ij} \frac{dL}{ds_{ij}} (\mathbf{z}_i - \mathbf{z}_j) (\mathbf{z}_i - \mathbf{z}_j)^\top \right) \mathbf{f}_m.$$

**Backpropagating through the odd update layer:**

Given the derivatives  $dL/d\mu_i^{out}$  of the loss function with respect to the output of an odd update layer, we can compute the derivatives of  $L$  with respect to its inputs  $\mathbf{r}_i$ ,  $\mathbf{W}_{ij}$  and  $\mu_j^{in}$  using

$$\begin{aligned} \frac{dL}{d\mathbf{r}_i} &= \begin{cases} (\mathbf{I} + \sum_k \mathbf{W}_{ik})^{-1} \frac{dL}{d\mu_i^{out}} & \text{if node } i \text{ is on an odd column} \\ 0 & \text{elsewise,} \end{cases} \\ \frac{dL}{d\mathbf{W}_{ij}} &= \left( \mathbf{I} + \sum_k \mathbf{W}_{ik} \right)^{-1} \frac{dL}{d\mu_i^{out}} (\mu_j^{in} - \mu_i^{out})^\top, \text{ for } i \text{ in odd columns,} \\ \frac{dL}{d\mu_j^{in}} &= \begin{cases} \frac{dL}{d\mu_j^{out}} + \sum_i \left( \mathbf{W}_{ij} (\mathbf{I} + \sum_k \mathbf{W}_{ik})^{-1} \frac{dL}{d\mu_i^{out}} \right) & \text{if node } j \text{ is on an even column} \\ 0 & \text{elsewise.} \end{cases} \end{aligned} \quad (10)$$

**Backpropagating through the even update layer:**

Given the derivatives  $dL/d\mu_i^{out}$  of the loss function with respect to the output of an even update layer, we can compute the derivatives of  $L$  with respect to its inputs  $\mathbf{r}_i$ ,  $\mathbf{W}_{ij}$  and  $\mu_j^{in}$  using

$$\begin{aligned} \frac{dL}{d\mathbf{r}_i} &= \begin{cases} (\mathbf{I} + \sum_k \mathbf{W}_{ik})^{-1} \frac{dL}{d\mu_i^{out}} & \text{if node } i \text{ is on an even column} \\ 0 & \text{elsewise,} \end{cases} \\ \frac{dL}{d\mathbf{W}_{ij}} &= \left( \mathbf{I} + \sum_k \mathbf{W}_{ik} \right)^{-1} \frac{dL}{d\mu_i^{out}} (\mu_j^{in} - \mu_i^{out})^\top, \text{ for } i \text{ in even columns,} \\ \frac{dL}{d\mu_j^{in}} &= \begin{cases} \frac{dL}{d\mu_j^{out}} + \sum_i \left( \mathbf{W}_{ij} (\mathbf{I} + \sum_k \mathbf{W}_{ik})^{-1} \frac{dL}{d\mu_i^{out}} \right) & \text{if node } j \text{ is on an odd column} \\ 0 & \text{elsewise.} \end{cases} \end{aligned} \quad (11)$$

### 3. Algorithmic description of the proposed Gaussian CRF network

---

**Algorithm 1** Gaussian CRF Network
 

---

Input: Image  $\mathbf{X}$

---

**Unary Network**

- 1: Apply the DeepLab CNN with parameters  $\theta_u^{CNN}$  to image  $\mathbf{X}$  to compute the unary predictions  $\mathbf{r} = \{\mathbf{r}_i\}$ .

$$\mathbf{r} = \text{DeepLabCNN}(\mathbf{X}, \theta_u^{CNN}).$$

**Pairwise Network**

- 2: Apply the pairwise network with parameters  $\{\theta_p^{CNN}, \{\mathbf{f}_m\}, \mathbf{C} \succeq 0\}$  to image  $\mathbf{X}$  to compute the pairwise matrices  $\{\mathbf{W}_{ij}\}$  used in the energy function.

- (a) **DeepLab CNN (parameters  $\theta_p^{CNN}$ ):** Compute per-pixel features  $\mathbf{z} = \{\mathbf{z}_i\}$ .

$$\mathbf{z} = \text{DeepLabCNN}(\mathbf{X}, \theta_p^{CNN}).$$

- (b) **Similarity layer (parameters  $\{\mathbf{f}_m\}$ ):** Compute the similarity measure  $s_{ij} \in [0, 1]$  for every pair of connected pixels  $i$  and  $j$  using the features  $\mathbf{z}$ .

$$s_{ij} = e^{-\sum_{m=1}^M (\mathbf{f}_m^\top (\mathbf{z}_i - \mathbf{z}_j))^2}.$$

- (c) **Matrix generation layer (parameters  $\mathbf{C} \succeq 0$ ):** Compute the matrix  $\mathbf{W}_{ij} \succeq 0$  for every pair of connected pixels  $i$  and  $j$  using the similarity measure  $s_{ij}$ .

$$\mathbf{W}_{ij} = s_{ij} \mathbf{C}.$$

**GMF Network**

- 3: Initialize the GMF network input  $\mu^1 = \mathbf{r}$ , and partition the nodes into even and odd columns  $\mu = \{\mu_e, \mu_o\}$ .

4: for  $t = 1$  to 5

- (a) **Even update layer:** Update the even column nodes  $\mu_e^{t+1}$  using  $\mathbf{r}$ ,  $\{\mathbf{W}_{ij}\}$  and  $\mu_o^t$ .

$$\mu_i^{t+1} = \left( I + \sum_j \mathbf{W}_{ij} \right)^{-1} \left( \mathbf{r}_i + \sum_j \mathbf{W}_{ij} \mu_j^t \right), \quad \mu_i \in \mu_e, \quad \mu_j \in \mu_o.$$

- (b) **Odd update layer:** Update the odd column nodes  $\mu_o^{t+1}$  using  $\mathbf{r}$ ,  $\{\mathbf{W}_{ij}\}$  and  $\mu_e^{t+1}$ .

$$\mu_i^{t+1} = \left( I + \sum_j \mathbf{W}_{ij} \right)^{-1} \left( \mathbf{r}_i + \sum_j \mathbf{W}_{ij} \mu_j^{t+1} \right), \quad \mu_i \in \mu_o, \quad \mu_j \in \mu_e.$$

- 5: Upsample  $\mu^6$  to the input image resolution using bilinear interpolation to obtain the class prediction scores at each pixel.

- 6: For each pixel, select the class label corresponding to the highest score.
- 

Output: Class label at each pixel.

---
